# Supplementary material for: A Systematic Comparison Identifies an ATP‐Based Viability Assay as Most Suitable Read‐Out for Drug Screening in Glioma Stem‐Like Cells
Source: Hindawi journal article supplement (doi:10.1155/2016/5623235), 2016-01-01
Supplement: f1 [file 5623235.f1.zip]

**Supplemental Table 1: Assay characteristics**

| <b>Name</b>      | <b>Type</b>        | <b>Based on</b>                                                   | <b>Half life*</b> | <b>Signal type</b> | <b>Incubation period</b> | <b>Result</b>                                                |
|------------------|--------------------|-------------------------------------------------------------------|-------------------|--------------------|--------------------------|--------------------------------------------------------------|
| Alamar Blue      | Cell viability     | Conversion of resazurin to resorufin by viable cells              | no                | C/F                | 1-4 hours                | Viability                                                    |
| CellTiter-Glo    | Cell viability     | ATP based luciferase reaction                                     | no                | L                  | 10 minutes               | Viability                                                    |
| CellTiter-Fluor  | Cell viability     | Active live-cell protease based cleavage of fluorogenic substrate | no                | F                  | 30 minutes – 3 hours     | Viability                                                    |
| Crystal Violet   | Cell viability     | Cell count                                                        | -                 | C                  | 30 minutes               | Viability                                                    |
| WST-1            | Cell viability     | Tetrazolium cleavage dependent on NAD(P)H production              | no                | C                  | 1 -4 hours               | Viability                                                    |
| Incucyte         | Cell proliferation | Cell Confluency                                                   | -                 | -                  | -                        | % of confluency                                              |
| Clonogenic Assay | Cell proliferation | Ability to form clones                                            | -                 | -                  | 30 minutes               | Amount of clones<br>plating efficiency<br>surviving fraction |
| Caspase-Glo 3/7  | Apoptosis          | Caspase-3/7 activity                                              | ≥ 5 hr            | L                  | 30 min – 3 hours         | Induced apoptosis                                            |
| CytoTox-Glo      | Cytotoxicity       | Dead-cell protease based cleavage of luminogenic substrate        | > 10 hr           | L                  | 30 minutes               | Cytotoxicity<br>Viability                                    |
| CytoTox-One      | Cytotoxicity       | LDH based conversion of resazurin to resorufin                    | 9 hr              | F                  | 10 minutes               | Cytotoxicity                                                 |

# Supplemental Figure 1

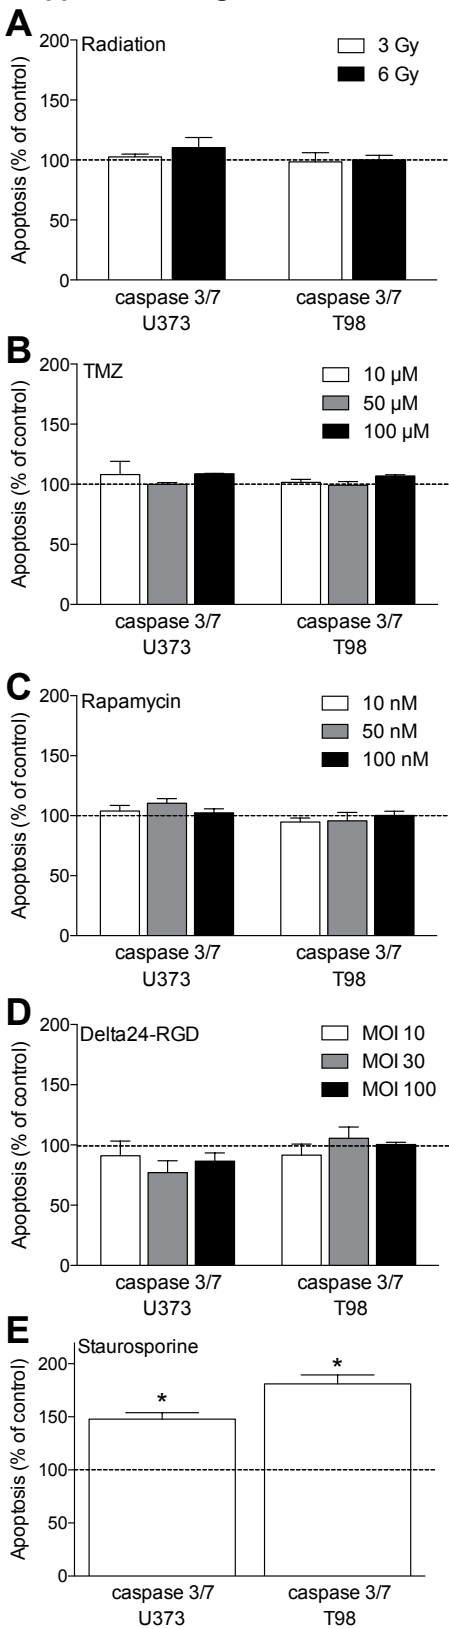

**Supplemental Figure 2**

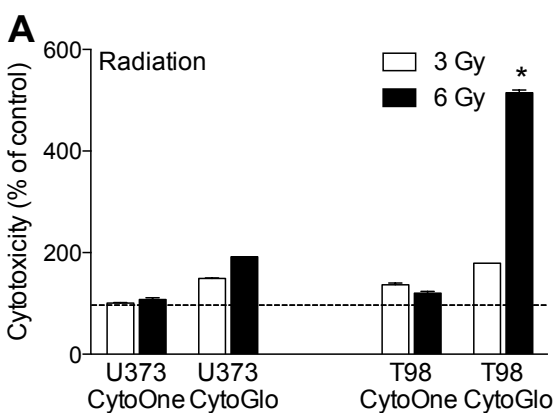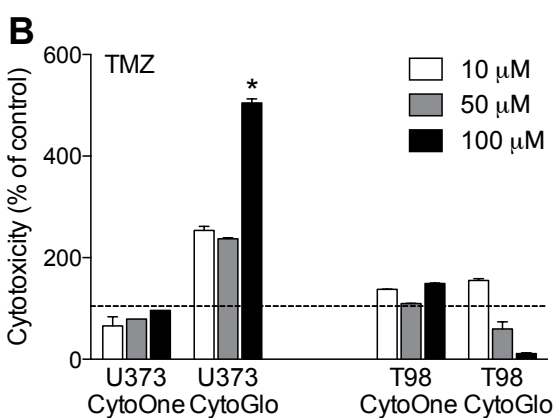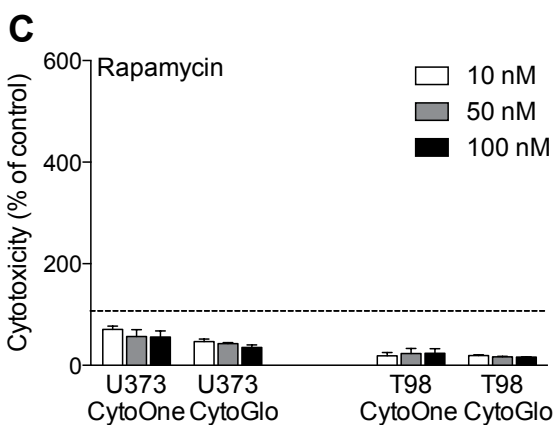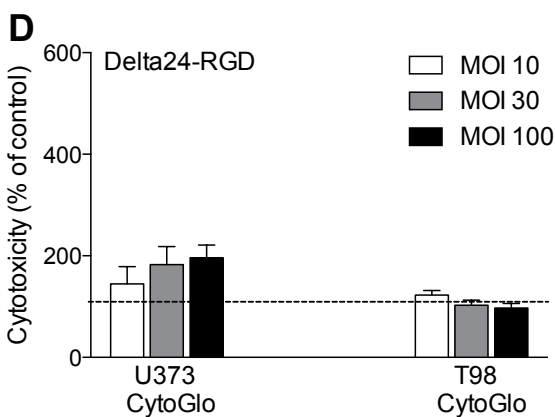

**Supplemental Table 2**

| <i>GS#</i> | <i>Primary/Recurrent</i> | <i>Diagnosis</i> | <i>MGMT status</i> |
|------------|--------------------------|------------------|--------------------|
| GS79       | Primary                  | GBM              | Unmethylated       |
| GS85       | Primary                  | GBM              | Methylated         |
| GS104      | Primary                  | GBM              | Methylated         |
| GS125      | Primary                  | GBM              | Unmethylated       |
| GS144      | Primary                  | Anaplastic OD    | Not determined     |
| GS149      | Primary                  | GBM              | Unmethylated       |
| GS184      | Primary                  | GBM              | Methylated         |
| GS281      | Primary                  | GBM              | Unmethylated       |
| GS295      | Primary                  | GBM              | Methylated         |
| GS330      | Primary                  | GBM              | Methylated         |
