# Supplementary material for: A Systematic Comparison Identifies an ATP‐Based Viability Assay as Most Suitable Read‐Out for Drug Screening in Glioma Stem‐Like Cells
Source: Hindawi journal article supplement (doi:10.1155/2016/5623235), 2016-01-01
Supplement: f1 [file 5623235.f1.zip]

Archive with 2 entries (2 files):
- 327838.f1.pdf
- Description.docx
